# Supplementary material for: Human Leukocyte Antigen C*12:02:02 and Killer Immunoglobulin-Like Receptor 2DL5 are Distinctly Associated with Ankylosing Spondylitis in the Taiwanese
Source: PubMed Central journal article supplement (PMC5578164; doi:10.3390/ijms18081775), 2017-08-16
Supplement: ijms-18-01775-s001.pdf [file ijms-18-01775-s001.pdf]

## Figure S1

|            | 1 $\alpha$ 1- $\alpha$ 2 domains |            |            |                  |            |            |            |            |            |            |     |
|------------|----------------------------------|------------|------------|------------------|------------|------------|------------|------------|------------|------------|-----|
| C*01:02:01 | MRVMAPRTLI                       | LLLSGALALT | ETWA-----  | CSHSMKYFFT       | SVSRPGRGEP | RFISVGYVDD | TOFVRFDSDA | ASPRGEPRAP | WVEQEGPEYW | DRETQYKRO  | 70  |
| C*03:02:01 | -----                            | -----      | -----      | G---R--Y- A----- | -----      | H--A-----  | -----      | -----      | -----      | -----      |     |
| C*12:02:02 | -----                            | -----      | -----      | ----R--Y- A----- | -----      | ---A-----  | -----      | -----      | -----      | -----      |     |
|            |                                  |            |            |                  |            |            |            |            |            |            |     |
| C*01:02:01 | AQTDRVSLRN                       | LRGYNQSEA  | GSHTLQWMC  | CDLGPDGRLL       | RGYDQYAYDG | KDYIALNEDL | RSWTAADTAA | QITQRKWEAA | REAEQRRAYL | EGTCVEWLR  | 170 |
| C*03:02:01 | -----                            | -----      | ---I--R-Y- | --V-----         | ----S----  | -----      | -----      | -----      | -----L---  | --L-----   |     |
| C*12:02:02 | --A-----                         | -----      | -----R-Y-  | -----S----       | -----      | -----      | -----      | -----      | -----W---  | -----      |     |
|            |                                  |            |            |                  |            |            |            |            |            |            |     |
|            | $\alpha$ 3 domain                |            |            |                  |            |            |            |            |            |            |     |
| C*01:02:01 | YLENGKETLQ                       | RAEHPKTHVT | HHPVSDHEAT | LRCWALGFYP       | AEITLTWQWD | GEDQTQDTEL | VETRPAGDGT | FQKWAAVMVP | SGEEQRYTCH | VQHEGLPEPL | 270 |
| C*03:02:01 | --K-----                         | -----      | -----      | -----            | -----      | -----      | -----      | -----V--   | -----      | -----      |     |
| C*12:02:02 | -----                            | -----      | -----      | -----            | -----R     | -----      | -----      | -----V--   | -----      | -----      |     |
|            |                                  |            |            |                  |            |            |            |            |            |            |     |
|            | Transmembrane helix              |            |            |                  |            |            |            |            |            |            |     |
| C*01:02:01 | TLRWEFSSQP                       | TIPVIGIVAG | LAVLAVLAVL | GAVVAVVMCR       | RKSSGGKGGG | CSQAASSNSA | QGSDESLIAC | KA         | 342        |            |     |
| C*03:02:01 | -----                            | -----      | -----      | -----            | -----      | -----      | -----      | ---        |            |            |     |
| C*12:02:02 | -----                            | -----      | -----      | -----M-----      | -----      | -----      | -----      | ---        |            |            |     |

**Fig. S1. The sequence alignment of HLA-C\*12:02:02 with HLA-C\*01:02:01 and HLA-C\*03:02:01.** The amino-acid sequences, residue numbers and the sequence alignment of HLA-C alleles were searched from the website of HLA Nomenclature (<http://hla.alleles.org>). The three HLA-C alleles are proteins of 342 amino acids, consisting of  $\alpha$ 1- $\alpha$ 2 domains (yellow region),  $\alpha$ 3 domain (green region) and a transmembrane helix (cyan region). The amino-acid residues marked in magenta represent the unique amino-acid residues in the HLA-C\*12:02:02, when compared to the sequence of HLA-C\*01:02:01 and HLA-C\*03:02:01.
